# Supplementary material
Source: PubMed Central journal article supplement (PMC8287645)

# Western Blot (Extended Data Figure 6c)

PLA2g7

Membrane Fraction

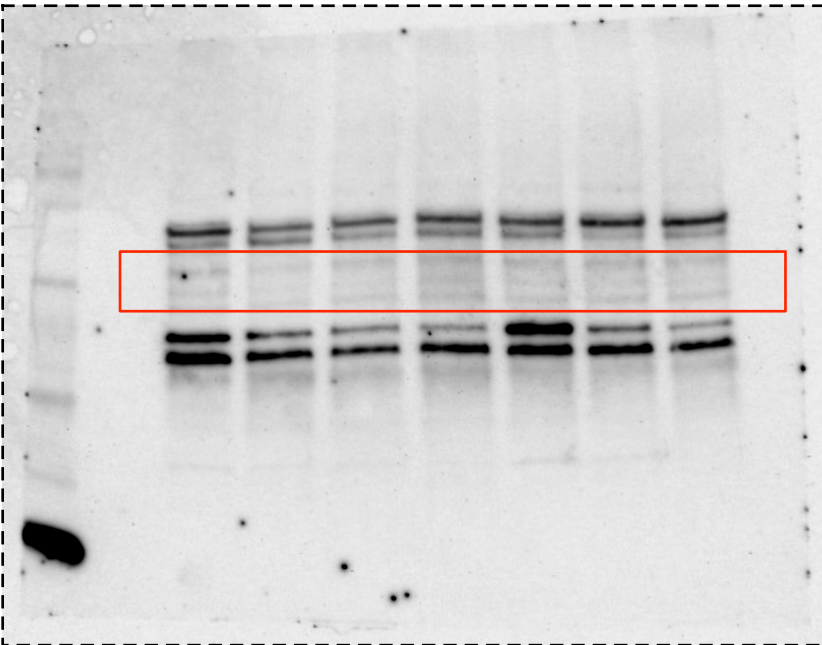

GAPDH

Membrane Fraction

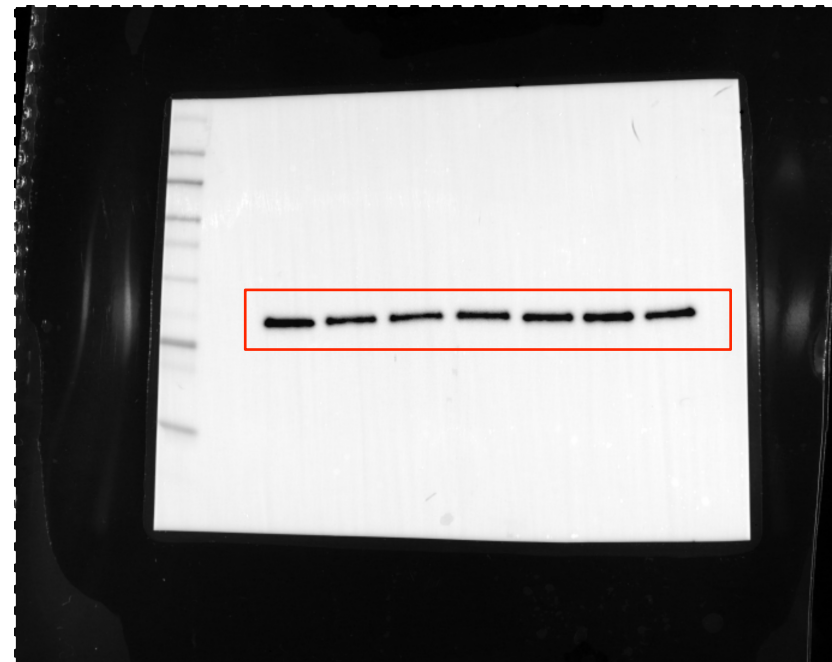

Cytosolic Fraction

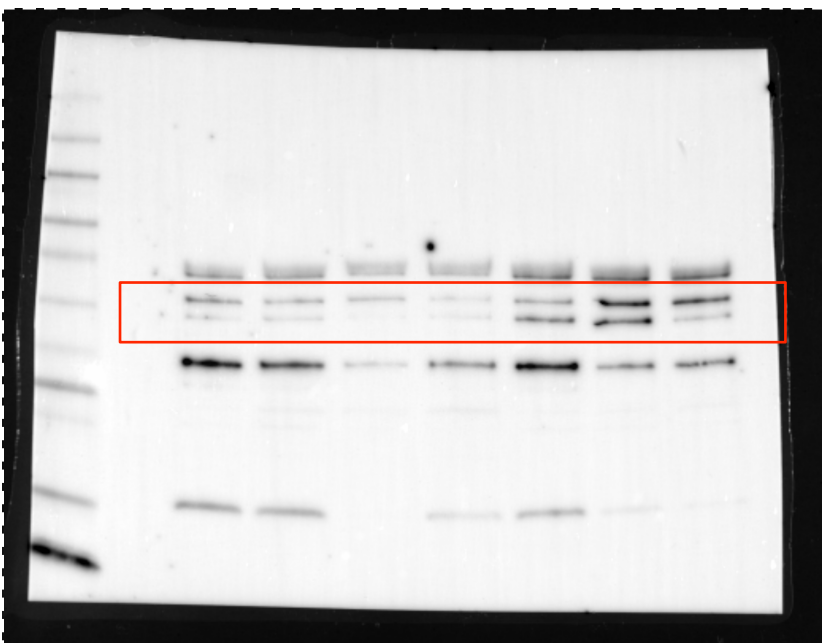

Cytosolic Fraction

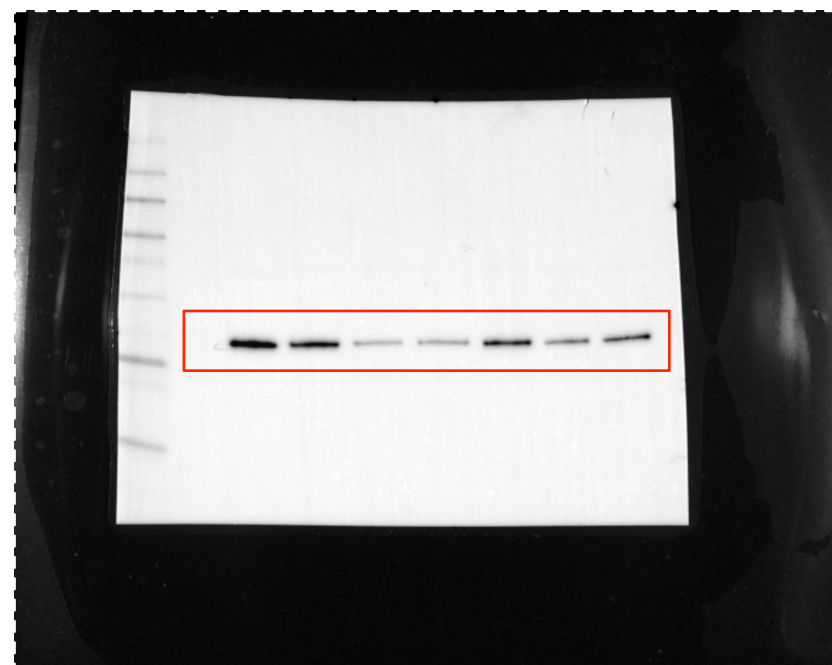

Supplement: NIHMS1704061-supplement-Extended_Data_Figure_6_Source_Data_Immunoblots.pdf [file NIHMS1704061-supplement-Extended_Data_Figure_6_Source_Data_Immunoblots.pdf]
